# Supplementary material
Source: publisher figshare collection journal article supplement (https://tandf.figshare.com/ndownloader/files/20161724)
Supplement: Supplementary file 1 [file 20161724]

## Supporting Information

### **Computational investigation reveals Picrasidine C as selective PPAR $\alpha$ lead: binding pattern, selectivity mechanism and ADME/Tox profile**

Fangfei Li <sup>a</sup>, Hanxun Wang <sup>a</sup>, Ying Wang <sup>a,b</sup>, Shasha Feng <sup>a</sup>, Baichun Hu <sup>a,c</sup>, Xiangyu  
Zhang <sup>a</sup>, Jian Wang <sup>a,\*</sup>, Wei Li <sup>d</sup>, Maosheng Cheng <sup>a</sup>

<sup>a</sup>Key Laboratory of Structure-Based Drugs Design and Discovery of Ministry of Education, Shenyang  
Pharmaceutical University, Shenyang Liaoning Province, P. R. China

<sup>b</sup>Wuya College of Innovation, Shenyang Pharmaceutical University, Shenyang Liaoning Province, P. R.  
China

<sup>c</sup>School of Pharmacy, Shenyang Pharmaceutical University, Shenyang Liaoning Province, P. R. China

<sup>d</sup>Faculty of Pharmaceutical Sciences, Toho University, Miyama 2-2-1, Funabashi, Chiba 274-8510,  
Japan

\*Correspondence: Jian Wang, School of Pharmaceutical Engineering, Shenyang Pharmaceutical  
University, Shenyang 110016, P. R. China. E-mail: jianwang@syphu.edu.cn; Fax: +86-24-23995043.  
Tel: +86-24-52430227.

# ConSurf Results

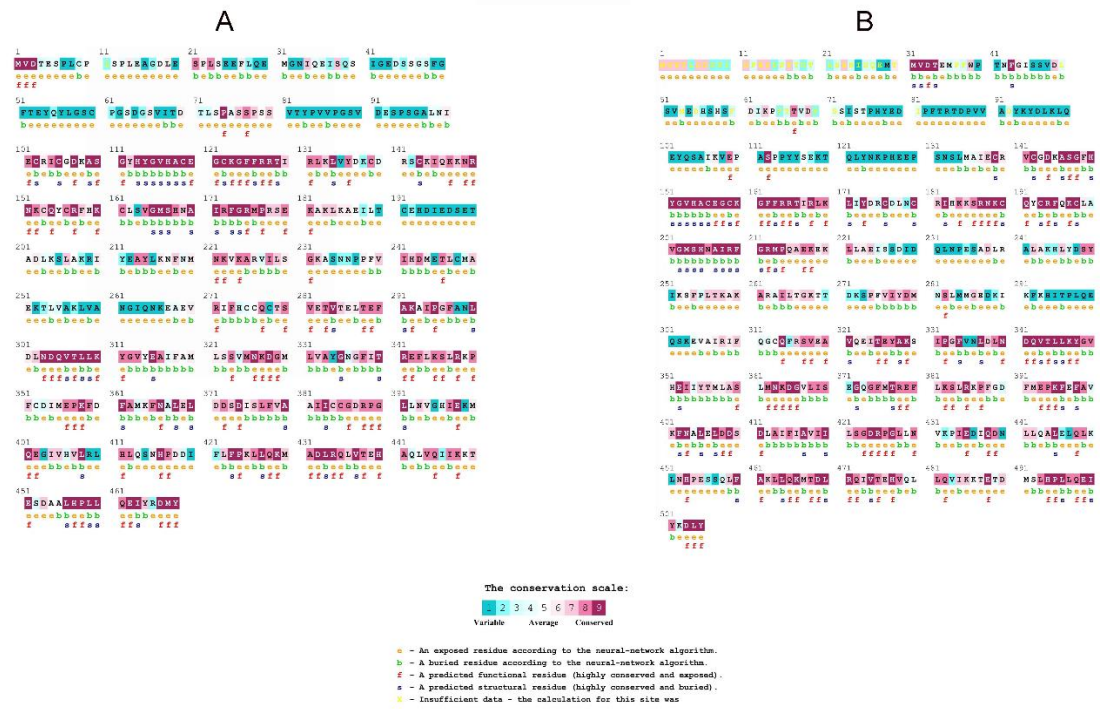

Figure S1. Key conservative amino acid analysis of PPAR $\alpha/\gamma$ .

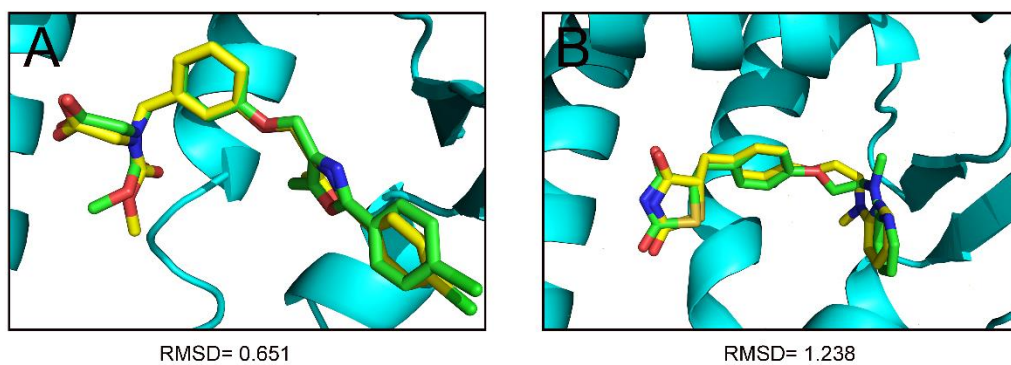

**Figure S2.** Glide docking validation: superimposition of the native (green) and redocked pose (yellow) of cocrystal ligand within the PPAR $\alpha/\gamma$ -LBD. (A: PPAR $\alpha$ , B: PPAR $\gamma$ )

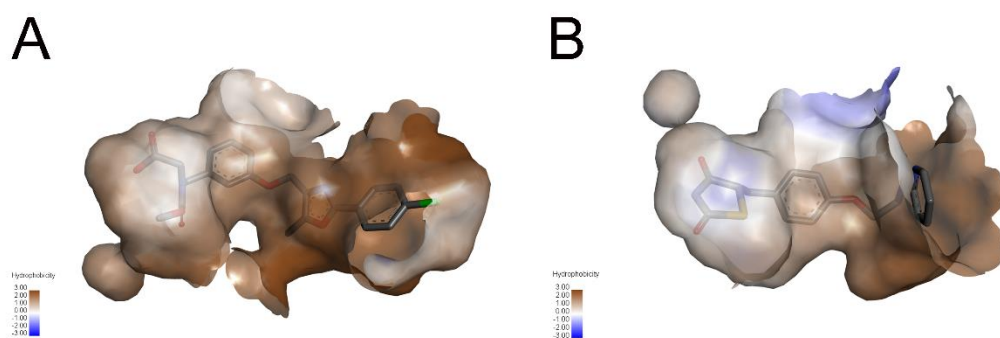

**Figure S3.** Hydrophobicity of the active cavity of PPAR $\alpha/\gamma$  structure.

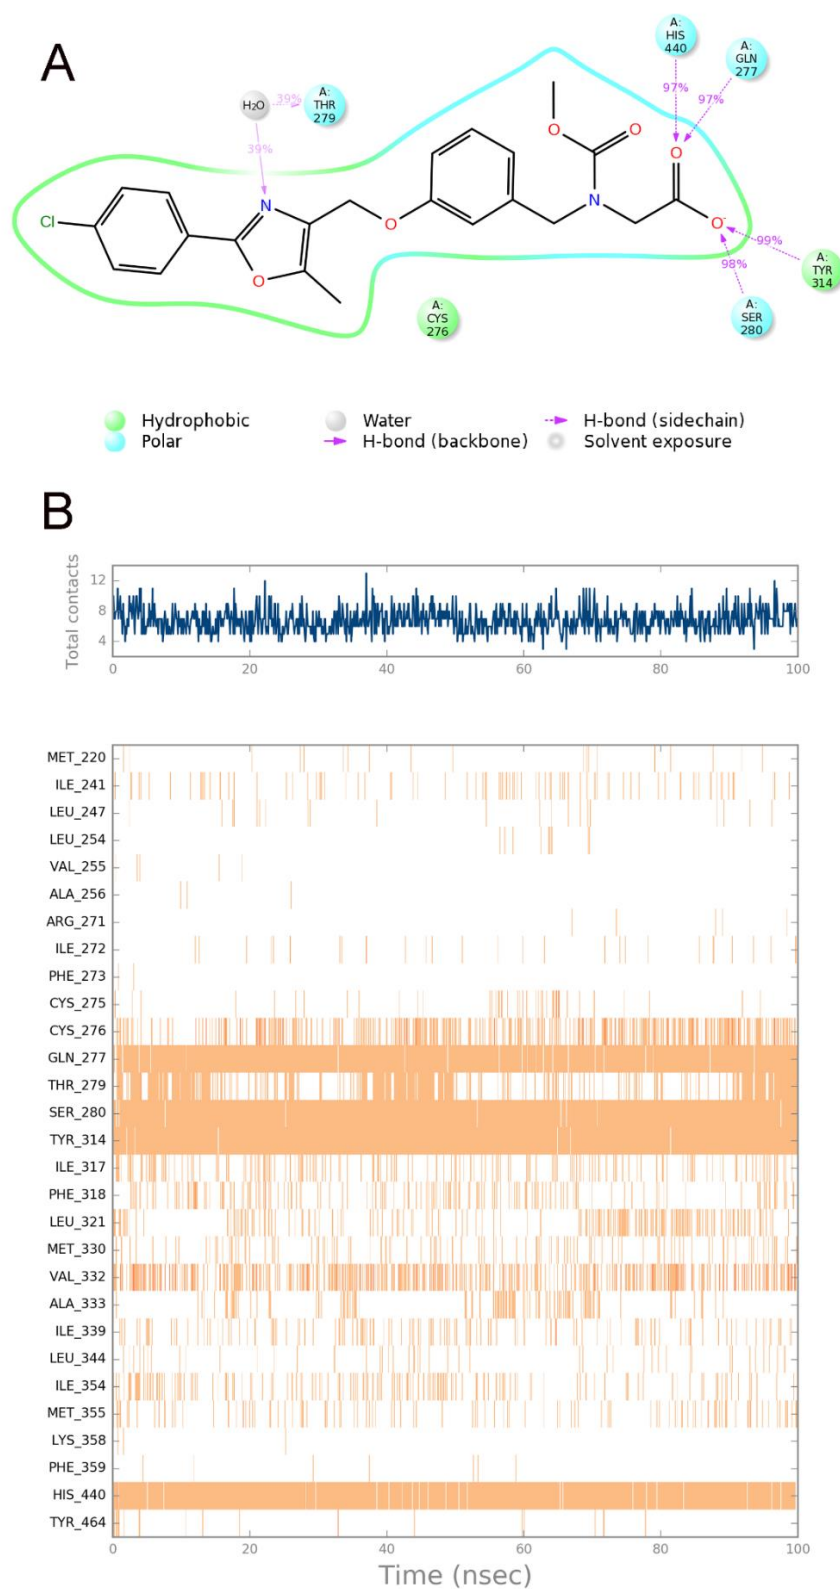

**Figure S4.** Ligand-Protein contacts of 3KDT-7HA complex during the simulation of 100 ns.



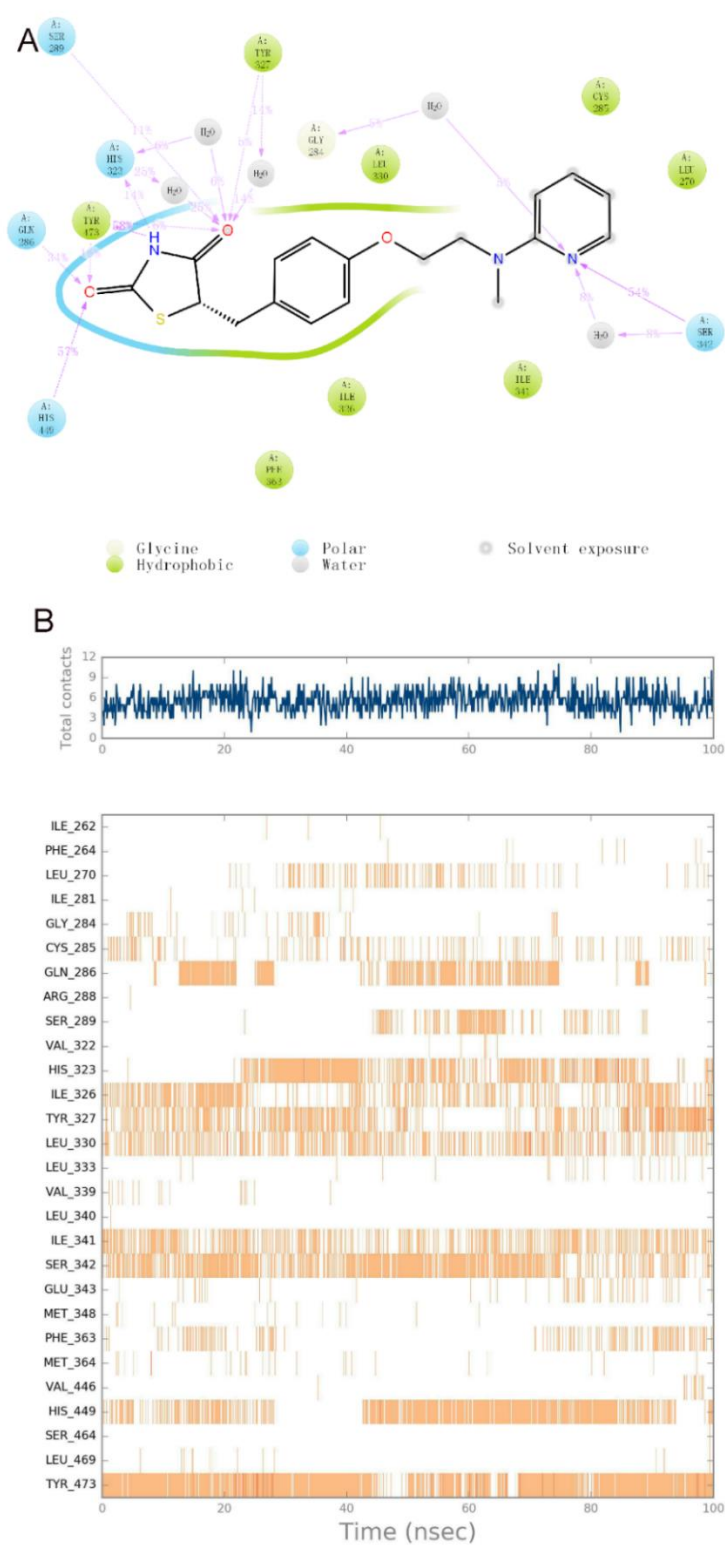

**Figure S6.** Ligand-Protein contacts of 2PRG-BRL complex during the simulation of 100 ns.

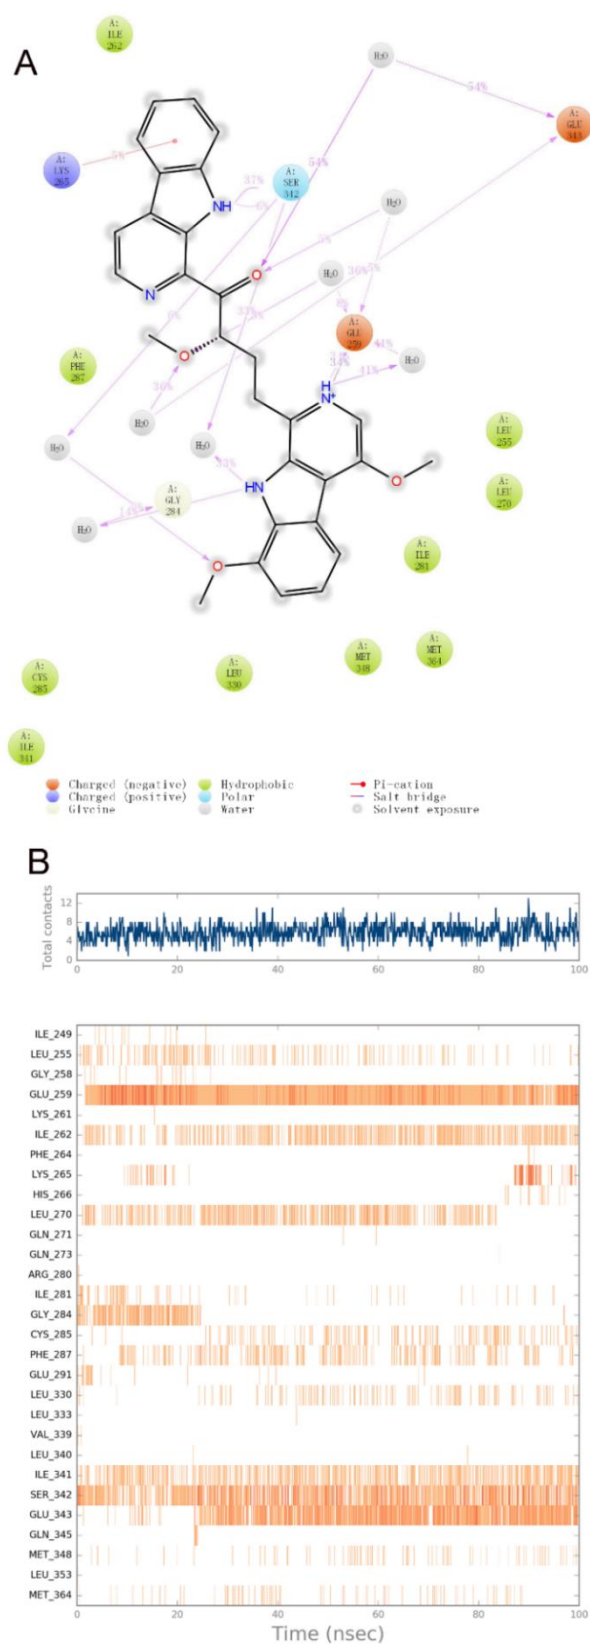

**Figure S7.** Ligand-Protein contacts of 2PRG-Picrasidine C-1 complex during the simulation of 100 ns.



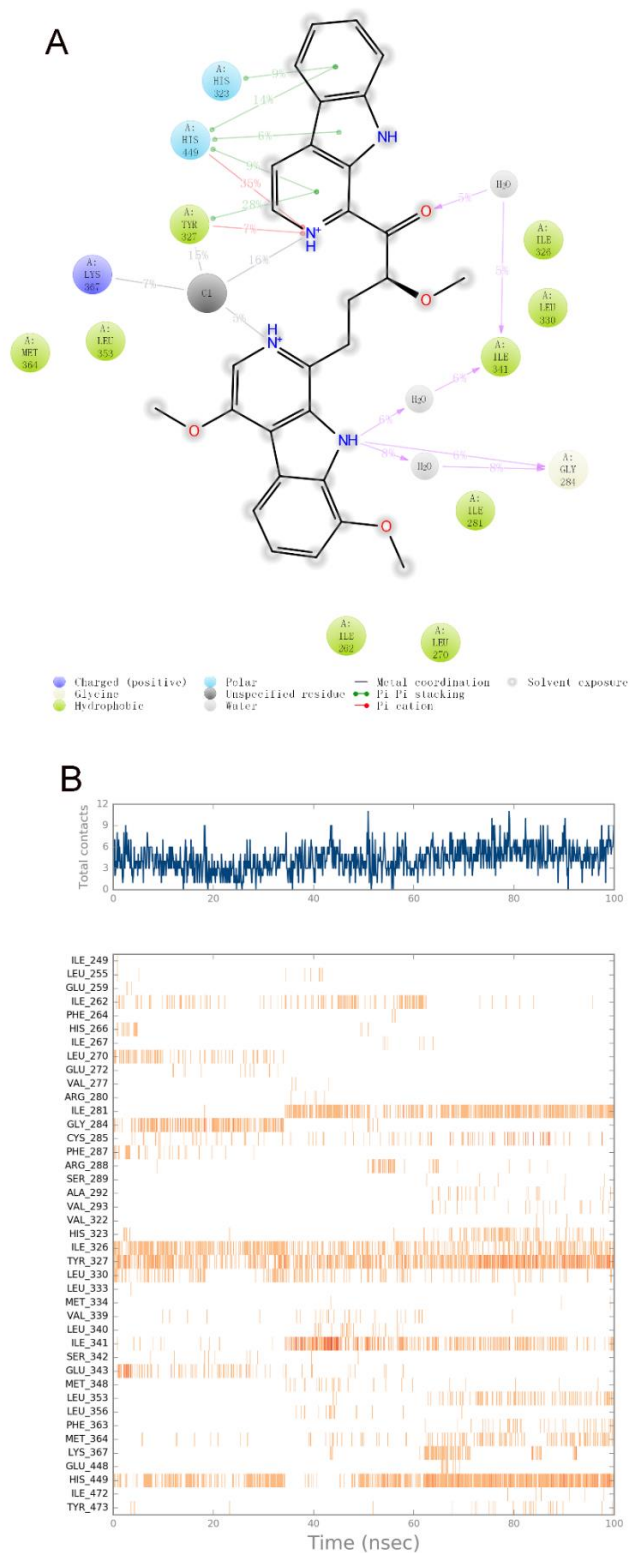

**Figure S8.** Ligand-Protein contacts of 2PRG-Picrasidine C-2 complex during the simulation of 100 ns.



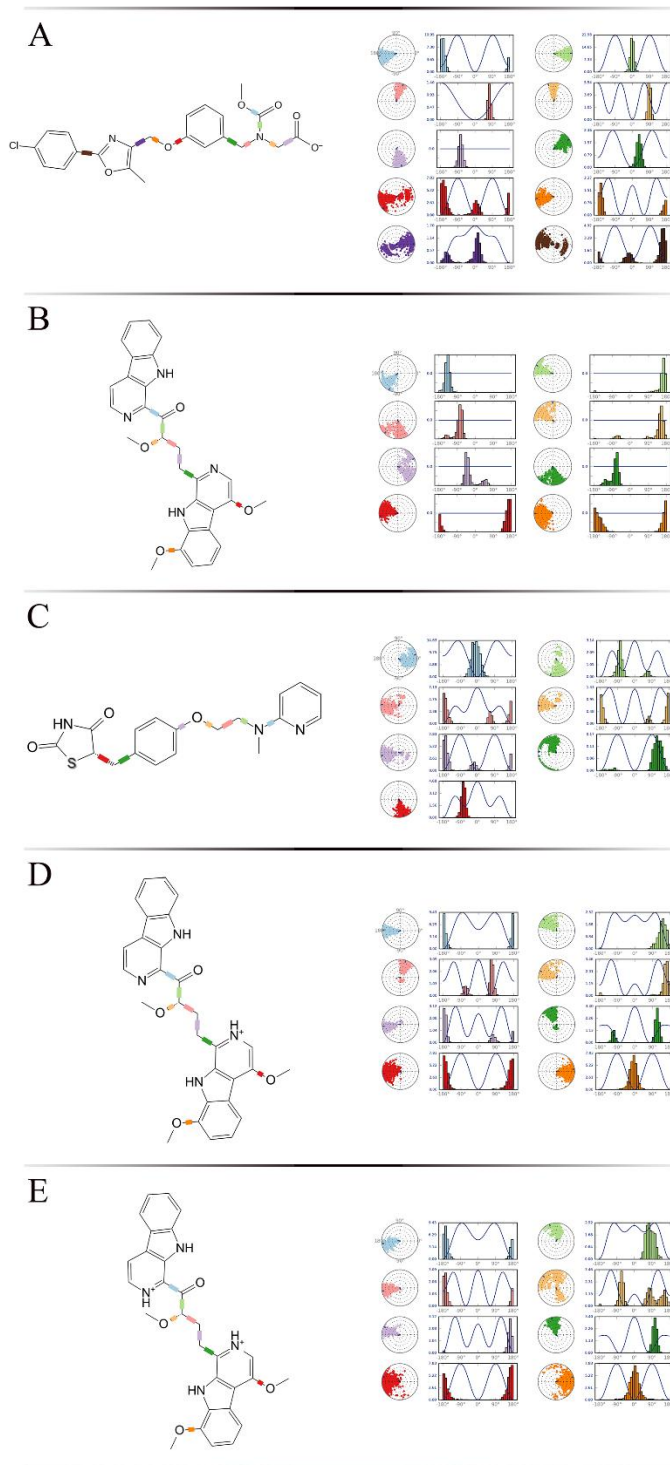

**Figure S9.** Ligand Torsion Profile of five complexes. A: 3KDT-7HA. B: 3KDT-Picrasidine C. C: 2PRG-BRL. D: 2PRG-Picrasidine C-1. E: 2PRG-Picrasidine C-2.

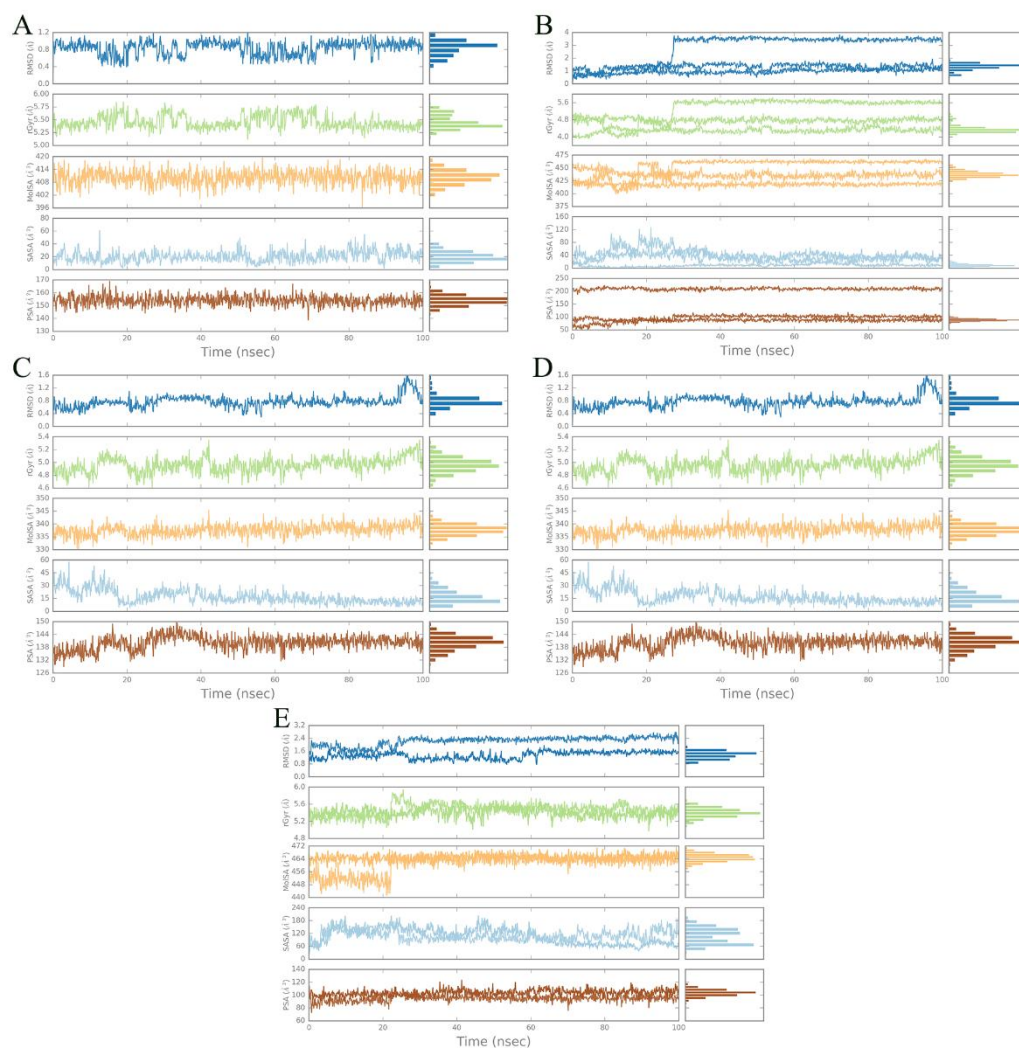

**Figure S10.** Five properties of the ligands in five complexes (A: 3KDT-7HA; B: 3KDT-Picrasidine C; C: 2PRG-BRL, D: 2PRG-Picrasidine C-1 and E: 2PRG-Picrasidine C-2) during the simulation of 100 ns.

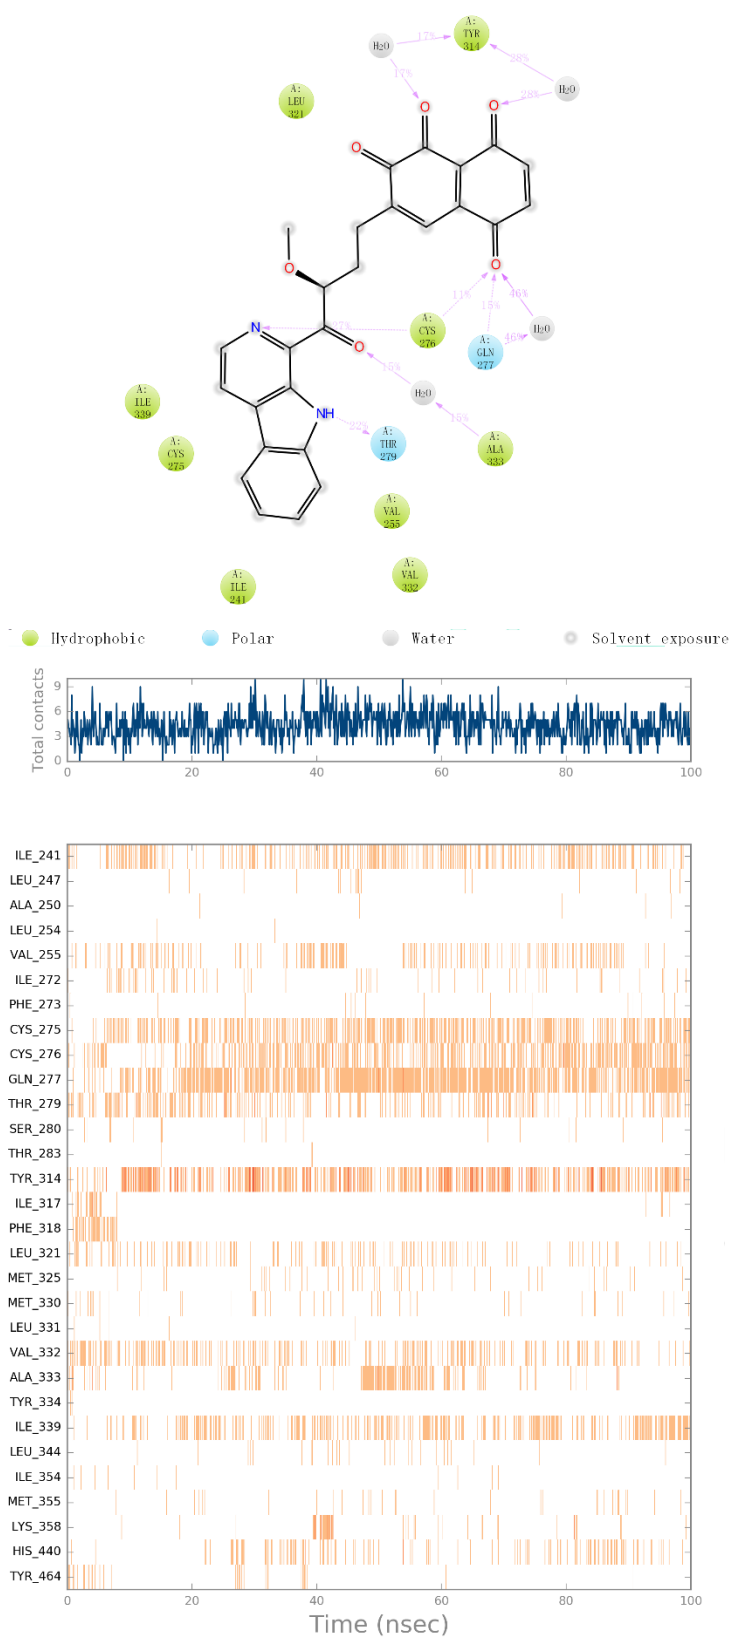

**Figure S11.** The contact diagram of the total number of specific contacts that protein formed with compound C1 during trajectory.

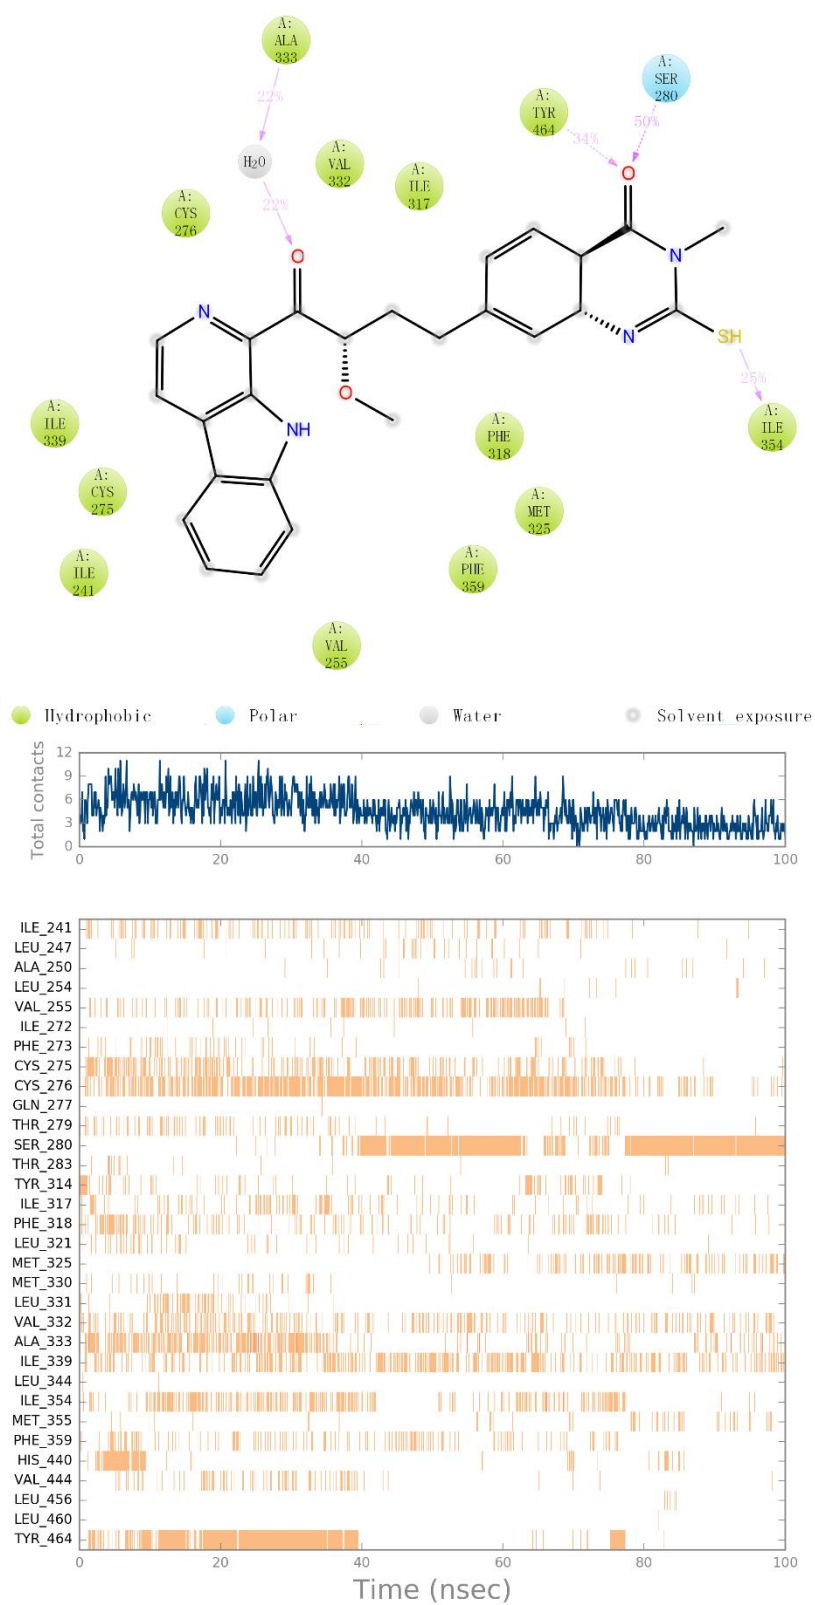

**Figure S12.** The contact diagram of the total number of specific contacts that protein formed with compound C2 during trajectory.

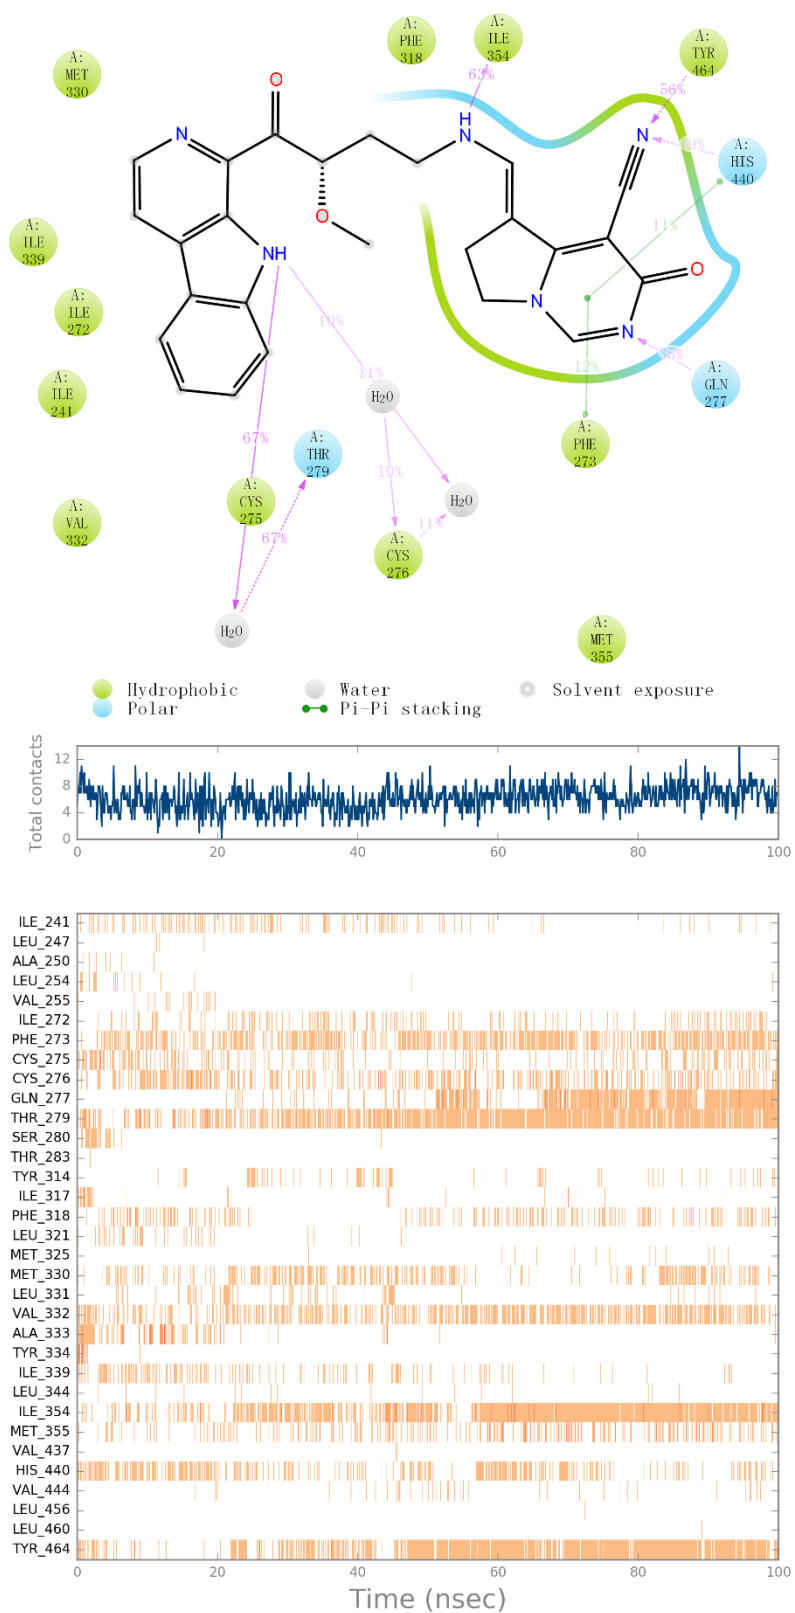

**Figure S13.** The contact diagram of the total number of specific contacts that protein formed with compound C3 during trajectory.

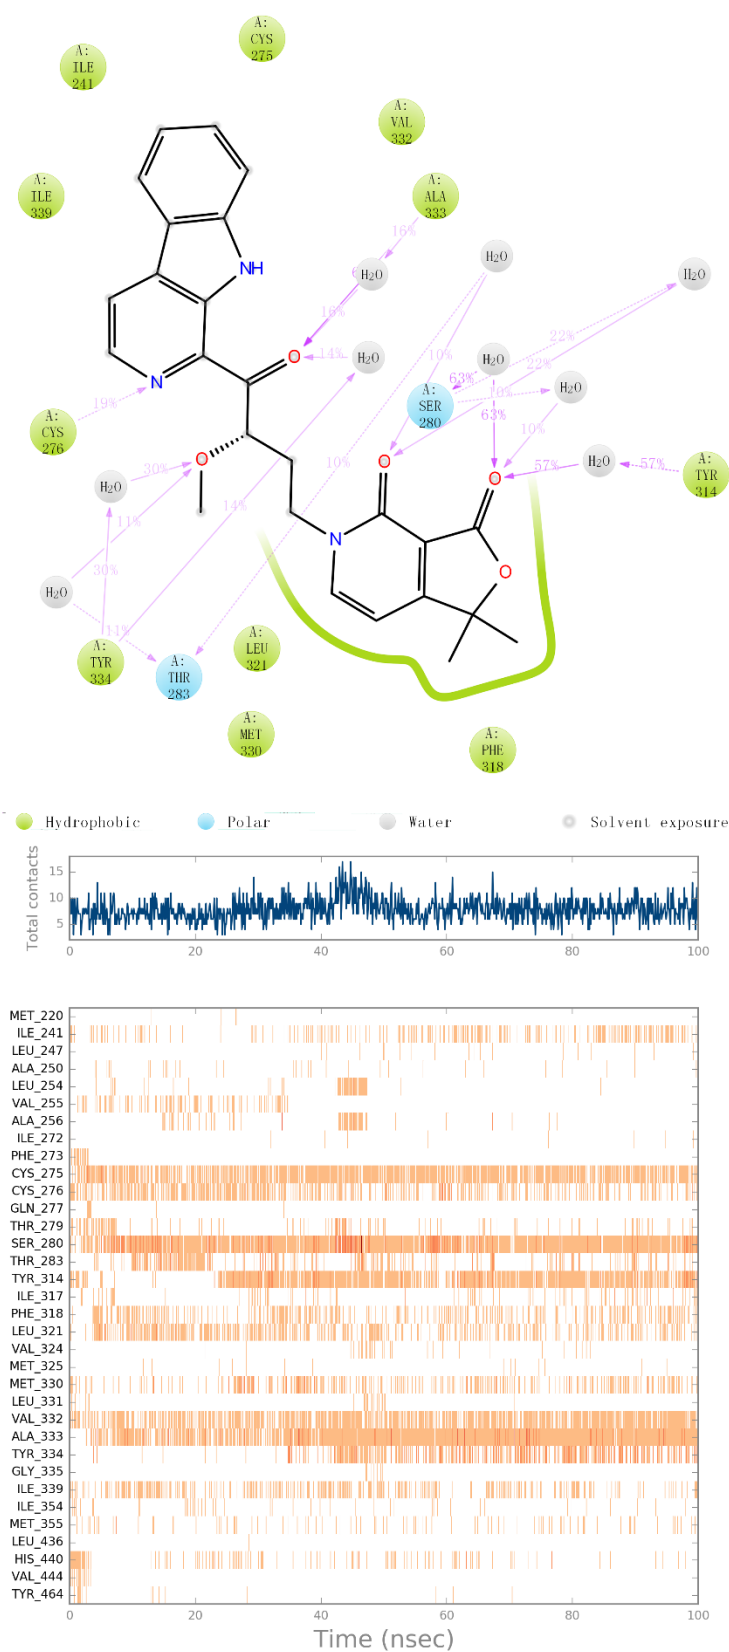

**Figure S14.** The contact diagram of the total number of specific contacts that protein formed with compound C4 during trajectory.

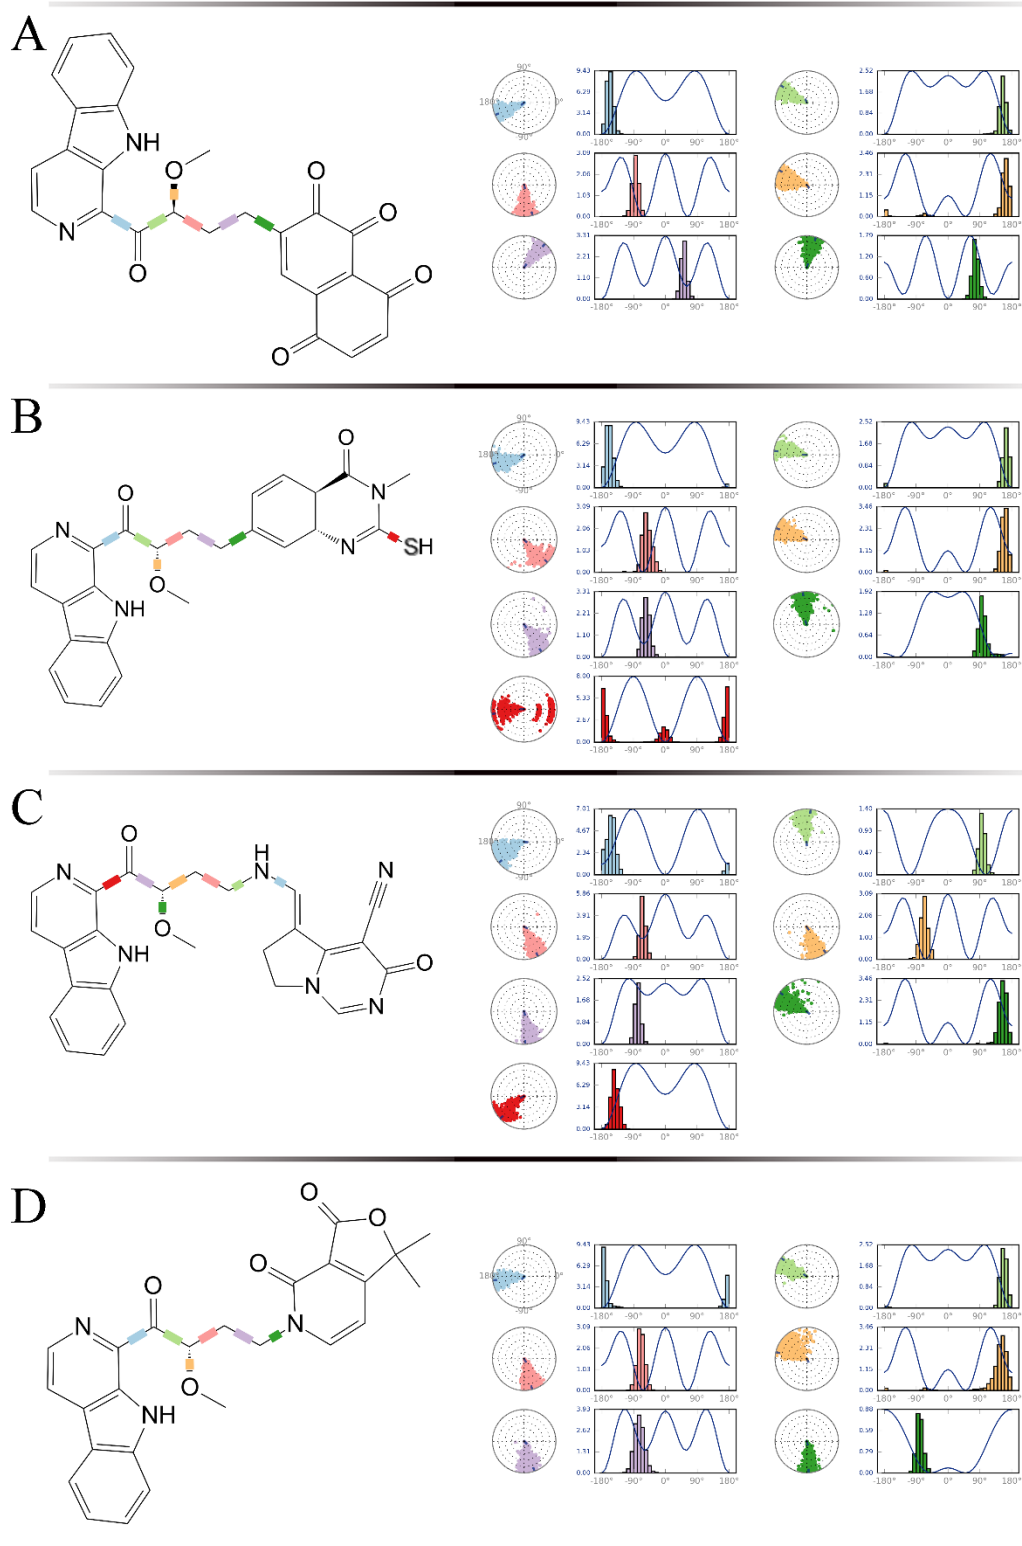

**Figure S15.** Ligand Torsion Profile of four complexes. A: 3KDT-C1. B: 3KDT-C2. C: 3KDT-C3. D: 3KDT-C4.



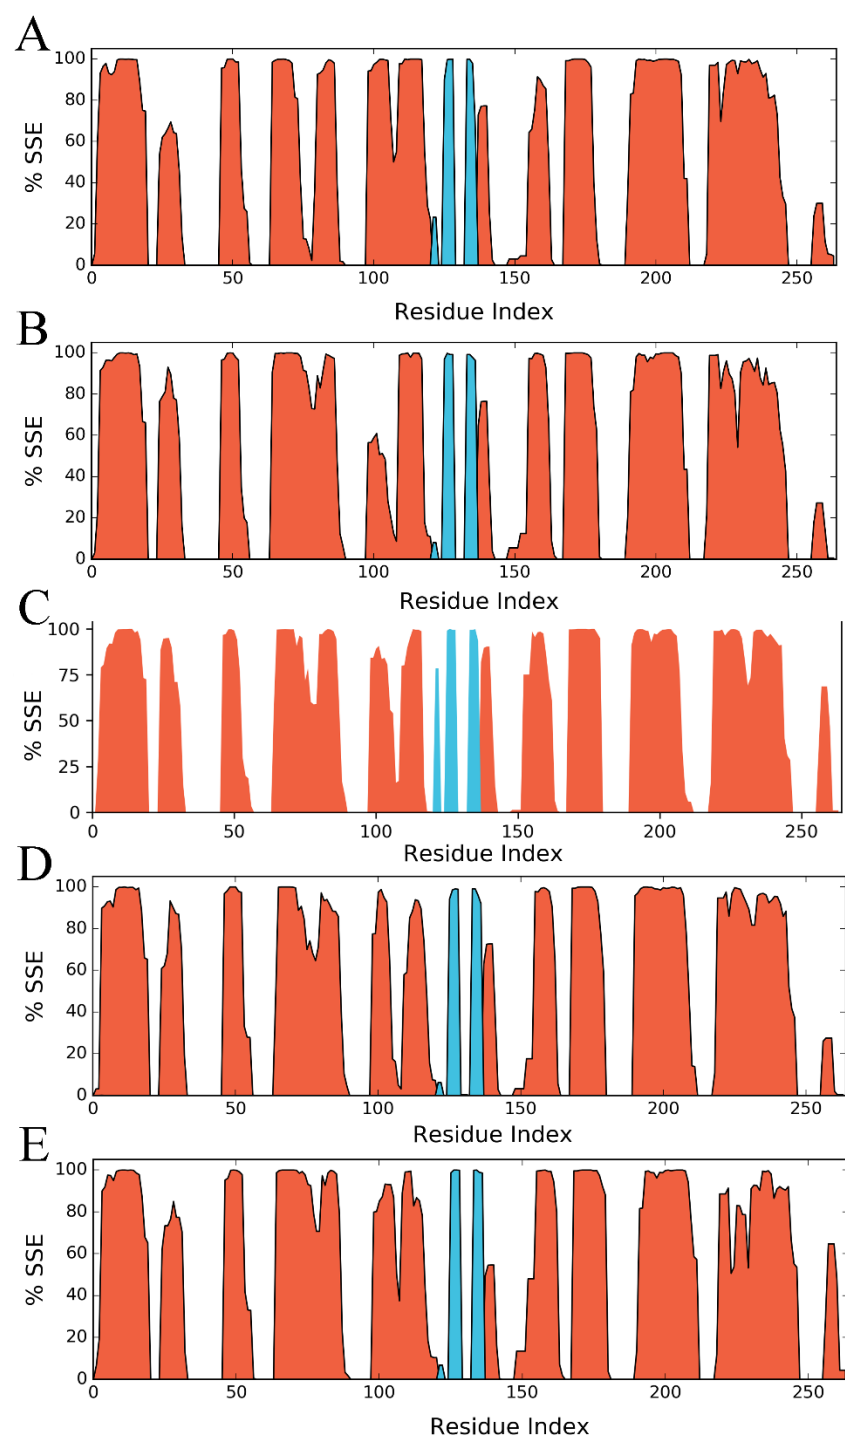

**Figure S16.** Protein secondary structure elements (SSE) distribution by residue index was monitored during the MD simulation. The protein secondary structures were displayed in different colors while orange denotes alpha-helices and blue denotes beta-strands. A: 3KDT-Picrasidine C complex. B: 3KDT-C1 complex. C: 3KDT-C2 complex. D: 3KDT-C3 complex. E: 3KDT-C4 complex.

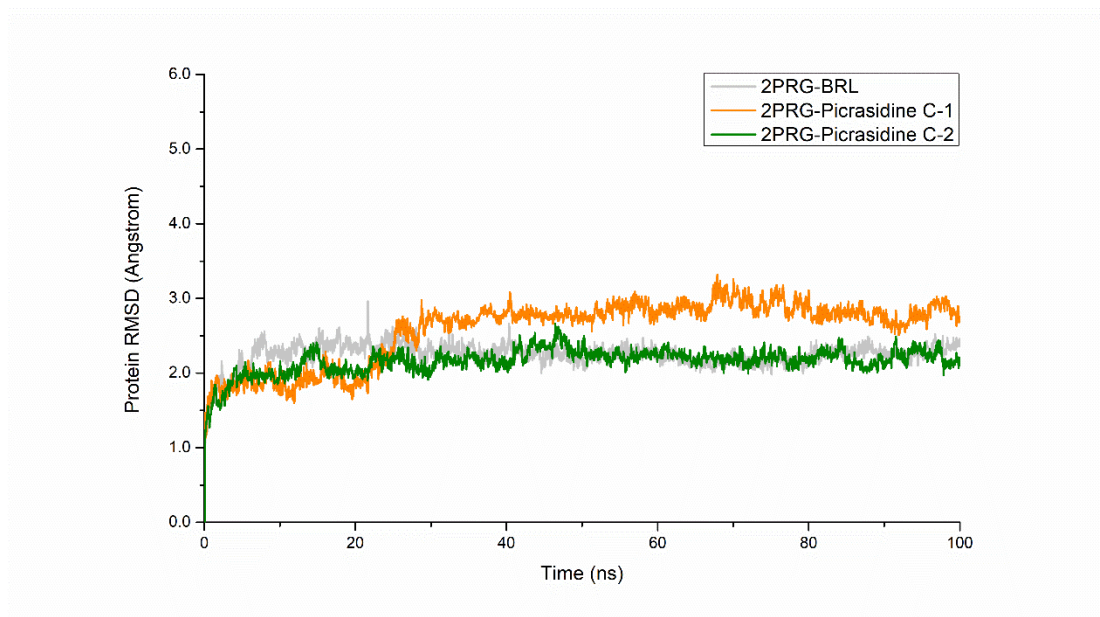

**Figure S17.** RMSD values of MD simulation performed by Amber version 18.

**Table S1.** Binding free energy (Kcal/mol) of cocystal ligand and Picrasidine C with PPAR $\alpha/\gamma$  calculated by MM-GBSA algorithm.

| Complex              | $\Delta G_{\text{bind}}$ | $\Delta G_{\text{bind}}$<br>coulomb | $\Delta G_{\text{bind}}$<br>Covalent | $\Delta G_{\text{bind}}$<br>Hbond | $\Delta G_{\text{bind}}$<br>lipo | $\Delta G_{\text{bind}}$<br>Solv_GB | $\Delta G_{\text{bind}}$<br>vdW |
|----------------------|--------------------------|-------------------------------------|--------------------------------------|-----------------------------------|----------------------------------|-------------------------------------|---------------------------------|
| 3KDT-7HA             | -113.839                 | 19.390                              | 2.069                                | -2.875                            | -61.035                          | -4.685                              | -66.704                         |
| 3KDT-Picrasidine C   | -98.879                  | -9.978                              | 8.883                                | -0.707                            | -69.722                          | 17.710                              | -44.181                         |
| 2PRG-BRL             | -99.150                  | -17.953                             | 2.530                                | -1.042                            | -46.307                          | 18.523                              | -54.515                         |
| 2PRG-Picrasidine C-1 | -81.506                  | 29.481                              | 9.665                                | -0.713                            | -55.671                          | -12.262                             | -52.007                         |
| 2PRG-Picrasidine C-2 | -50.567                  | 102.579                             | 10.647                               | -0.155                            | -58.574                          | -45.821                             | -58.789                         |

**Table S2.** All parameters of Fenofibrate and Picrasidine C predicted by the pkCSM online software.

| ADMET properties |                               | Fenofibrate | Picrasidine C |
|------------------|-------------------------------|-------------|---------------|
| Absorption       | Water solubility (log mol/L)  | -5.891      | -3.172        |
|                  | Caco2 permeability (log cm/s) | 1.048       | 1.17          |
|                  | Intestinal absorption (human) | 95.92       | 100           |
|                  | Skin Permeability (logKp)     | -2.495      | -2.735        |

|              |                                                         |        |        |
|--------------|---------------------------------------------------------|--------|--------|
|              | P-glycoprotein substrate                                | No     | No     |
|              | P-glycoprotein I inhibitor                              | Yes    | Yes    |
|              | P-glycoprotein II inhibitor                             | No     | Yes    |
| Distribution | VDss (human) (log L/kg)                                 | 0.052  | -0.212 |
|              | Fraction unbound (human)                                | 0.006  | 0.191  |
|              | BBB permeability (logBB)                                | 0.066  | -0.424 |
|              | CNS permeability (logPS)                                | -1.953 | -3.396 |
| Metabolism   | CYP2D6 substrate                                        | No     | No     |
|              | CYP3A4 substrate                                        | Yes    | Yes    |
|              | CYP1A2 inhibitor                                        | Yes    | Yes    |
|              | CYP2C19 inhibitor                                       | Yes    | Yes    |
|              | CYP2C9 inhibitor                                        | Yes    | Yes    |
|              | CYP2D6 inhibitor                                        | No     | No     |
|              | CYP3A4 inhibitor                                        | No     | Yes    |
| Excretion    | Total Clearance (log ml/min/kg)                         | -0.332 | 0.704  |
|              | Renal OCT2 substrate                                    | No     | No     |
| Toxicity     | AMES toxicity                                           | No     | No     |
|              | Max. tolerated dose (human)<br>(log mg/kg/day)          | 0.555  | 0.528  |
|              | hERG I inhibitor                                        | No     | No     |
|              | hERG II inhibitor                                       | No     | Yes    |
|              | Oral Rat Acute Toxicity<br>(LD50) (mol/kg)              | 2.325  | 2.621  |
|              | Oral Rat Chronic Toxicity<br>(LOAEL) (log mg/kg_bw/day) | 1.411  | 1.998  |
|              | Hepatotoxicity                                          | No     | Yes    |
|              | Skin Sensitisation                                      | No     | No     |
|              | T.Pyriiformis toxicity (log ug/L)                       | 1.165  | 0.285  |

Minnow toxicity (log LC50)      -1.772      -4.12

---

**Table S3.** Binding free energy (Kcal/mol) of Picrasidine C and four selected analogs with PPAR $\alpha$  calculated by MM-GBSA algorithm.

| Complex            | $\Delta G_{\text{bind}}$ | $\Delta G_{\text{bind}}$<br>coulomb | $\Delta G_{\text{bind}}$<br>Covalent | $\Delta G_{\text{bind}}$<br>Hbond | $\Delta G_{\text{bind}}$<br>lipo | $\Delta G_{\text{bind}}$<br>Solv_GB | $\Delta G_{\text{bind}}$<br>vdW |
|--------------------|--------------------------|-------------------------------------|--------------------------------------|-----------------------------------|----------------------------------|-------------------------------------|---------------------------------|
| 3KDT-Picrasidine C | -98.879                  | -9.978                              | 8.883                                | -0.707                            | -69.722                          | 17.710                              | -44.181                         |
| 3KDT-C1            | -115.284                 | 5.316                               | 4.256                                | -1.254                            | -44.127                          | -11.237                             | -68.238                         |
| 3KDT-C2            | -118.872                 | 4.861                               | 6.872                                | -0.339                            | -49.157                          | -18.825                             | -62.284                         |
| 3KDT-C3            | -110.237                 | -5.472                              | -3.452                               | -0.926                            | -26.575                          | 5.482                               | -79.294                         |
| 3KDT-C4            | -105.438                 | 8.982                               | -4.231                               | -0.255                            | -31.483                          | -21.257                             | -57.194                         |
